# Supplementary material for: A sensitive method to determine melatonin in saliva by automated online in-tube solid-phase microextraction coupled with stable isotope-dilution liquid chromatography-tandem mass spectrometry
Source: Royal Society of Chemistry journal article supplement (doi:10.1039/c7ay00622e), 2017-01-01
Supplement: c7ay00622e1.pdf [file c7ay00622e1.pdf]

Supplementary information

Sensitive method to determine melatonin in saliva by  
automated online in-tube solid-phase microextraction  
coupled with stable isotope-dilution liquid  
chromatography-tandem mass spectrometry

Atsushi Ishizaki, Akiko Uemura and Hiroyuki Kataoka\*

*School of Pharmacy, Shujitsu University, Nishigawara, Okayama 703-8516, Japan*

\* Corresponding author (Tel. & fax: +81-86-271-8342; E-mail: [hkataoka@shujitsu.ac.jp](mailto:hkataoka@shujitsu.ac.jp))

## Supplementary figures

Fig. S1 Structures of MLT and MLT-d<sub>4</sub> used as an internal standard.

Fig. S2 Schematic diagram of the automated online in-tube SPME/LC–MS/MS system.

Fig. S1 Structures of melatonin and melatonin-d<sub>4</sub> used as an internal standard.

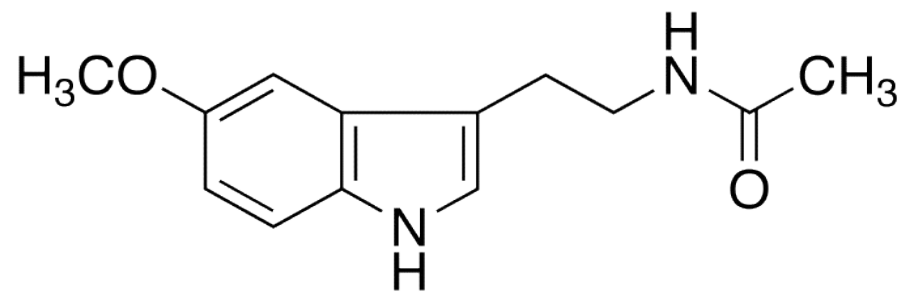

Melatonin

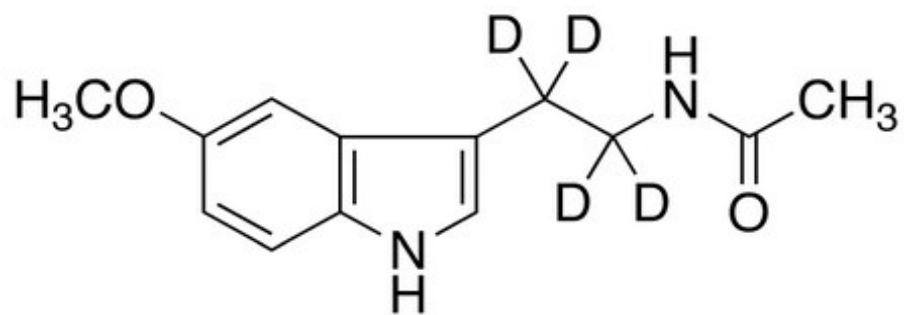

Melatonin-d<sub>4</sub>

Fig. S2 Schematic diagram of the automated online in-tube SPME/LC-MS/MS system.

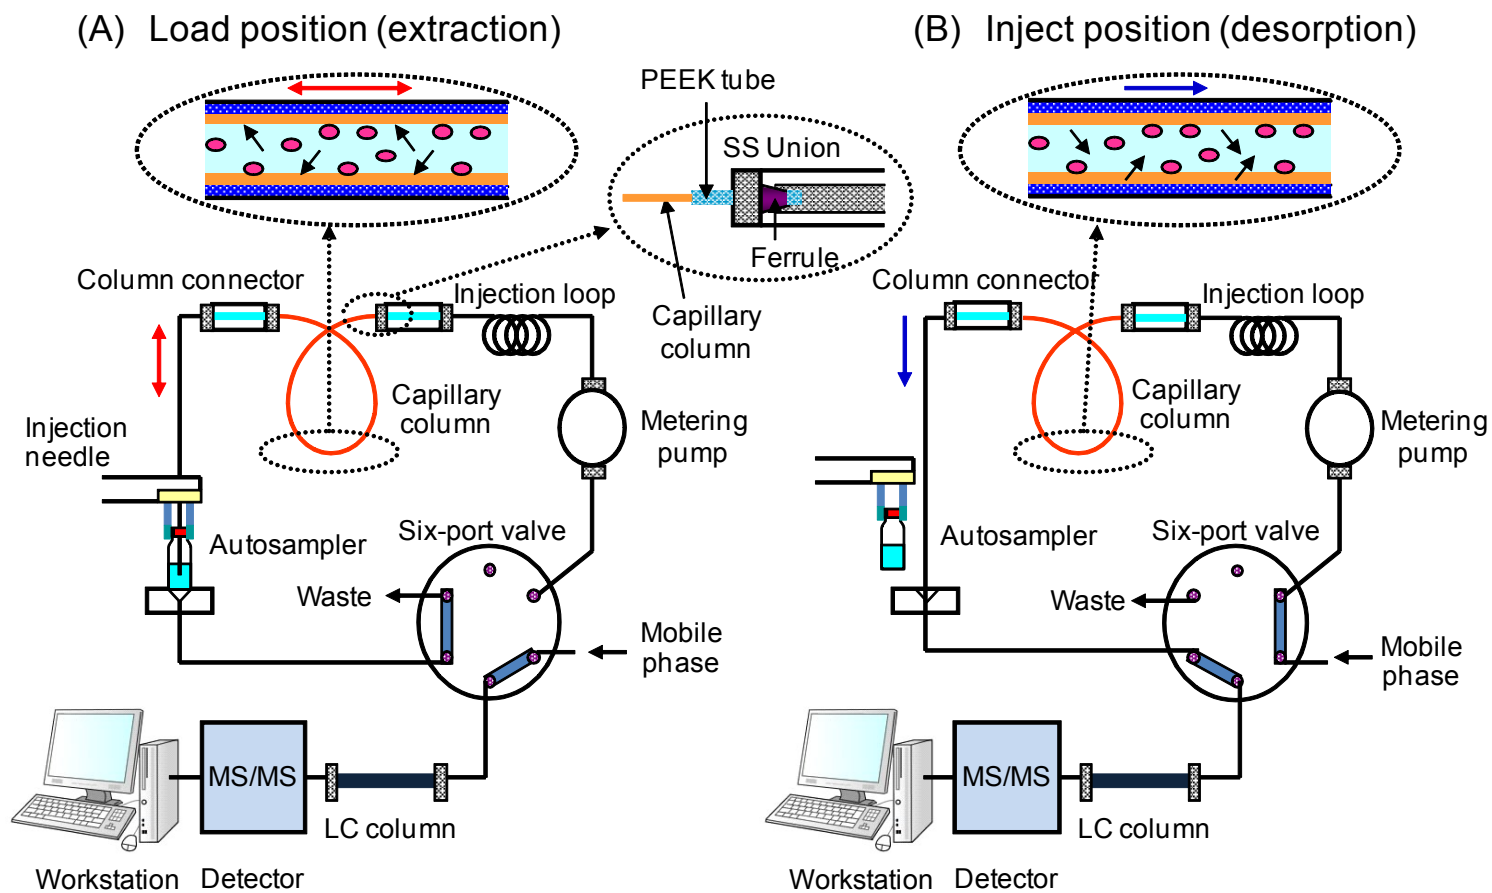

Table S1 MRM conditions for MLT and MLT-d<sub>4</sub>.

| Compound                                  | Q1<br>(precursor ion) | Q3<br>(product ion) | Dwell time<br>(ms) | DP (V) | EP (V) | CE (eV) | CXP (V) |
|-------------------------------------------|-----------------------|---------------------|--------------------|--------|--------|---------|---------|
| MLT<br>(Quantitation)                     | 233.3                 | 174.3               | 333                | 60     | 15     | 20      | 5       |
| MLT<br>(Confirmation)                     | 233.3                 | 159.1               | 333                | 60     | 15     | 30      | 15      |
| MLT-d <sub>4</sub><br>(Internal standard) | 237.3                 | 178.3               | 333                | 60     | 15     | 20      | 5       |

Table S2 Program for the in-tube SPME process.

| Sequence | Event                                                | Switching valve | Vial   | Draw/eject          |             |                               |
|----------|------------------------------------------------------|-----------------|--------|---------------------|-------------|-------------------------------|
|          |                                                      |                 |        | Cycle <sup>a)</sup> | Volume (μL) | Speed (μL min <sup>-1</sup> ) |
| 1        | Conditioning of the capillary                        | Load            | MeOH   | D/E (2)             | 40          | 200                           |
| 2        | Drawing of air into the capillary                    | Load            | Empty  | D (1)               | 50          | 200                           |
| 3        | Conditioning of the capillary                        | Load            | Water  | D/E (2)             | 40          | 200                           |
| 4        | Extraction of analytes into the capillary            | Load            | Sample | D/E (25)            | 40          | 200                           |
| 5        | Needle washing                                       | Load            | MeOH   | D/E (1)             | 2           | 200                           |
| 6        | Desorption of analytes from the capillary            | Inject          | –      | –                   | –           | –                             |
| 7        | HPLC separation of analytes and return to sequence 1 | Load            | –      | –                   | –           | –                             |

<sup>a)</sup> D: draw, E: ejection.

Table S3 Precision of MLT measurements by in-tube SPME LC–MS/MS.

| Compound | Concentration            | Precision (RSD %) <sup>a)</sup> |           |
|----------|--------------------------|---------------------------------|-----------|
|          |                          | Intra-day                       | Inter-day |
| MLT      | 1.0 pg mL <sup>-1</sup>  | 4.1                             | 5.8       |
|          | 10.0 pg mL <sup>-1</sup> | 3.0                             | 3.6       |

<sup>a)</sup>  $n = 5$ .

Table S4 Recoveries of MLT spiked into saliva samples.

| Compound | Concentration (pg mL <sup>-1</sup> saliva) |                          | Recovery (%) |
|----------|--------------------------------------------|--------------------------|--------------|
|          | Spiked                                     | Mean ± SD ( <i>n</i> =3) |              |
| MLT      | 0                                          | 3.8 ± 0.1                |              |
|          | 10.0                                       | 13.4 ± 1.0               | 96           |
|          | 100.0                                      | 102.1 ± 3.9              | 98           |
